# Supplementary material for: Oral Administration of Bovine Milk-Derived Extracellular Vesicles Attenuates Cartilage Degeneration via Modulating Gut Microbiota in DMM-Induced Mice
Source: MDPI journal article supplement (doi:10.3390/nu15030747), 2023-02-01
Supplement: s1 [file s1]

Table S1 The OARSI scoring system.

|                                                                                                           | Score |
|-----------------------------------------------------------------------------------------------------------|-------|
| Normal                                                                                                    | 0     |
| Loss of Safranin O without structural changes                                                             | 0.5   |
| Small fibrillations without loss of cartilage                                                             | 1     |
| Vertical clefts down to the layer immediately below the superficial layer and some loss of surface lamina | 2     |
| Vertical clefts/erosion to the calcified cartilage extending to <25% of the articular surface             | 3     |
| Vertical clefts/erosion to the calcified cartilage extending to 25-50% of the articular surface           | 4     |
| Vertical clefts/erosion to the calcified cartilage extending to 50-75% of the articular surface           | 5     |
| Vertical clefts/erosion to the calcified cartilage extending to >75% of the articular surface             | 6     |

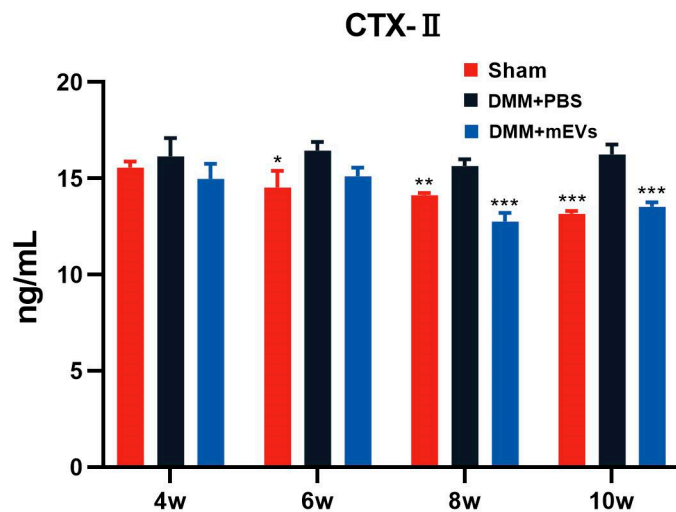

**Figure S1** The serum CTX-II levels were determined by ELISA. All data are shown as means  $\pm$  SD deviation ( $n = 3$ ). \* $p < 0.05$ , \*\* $p < 0.01$ , \*\*\* $p < 0.001$  vs. DMM+PBS group.

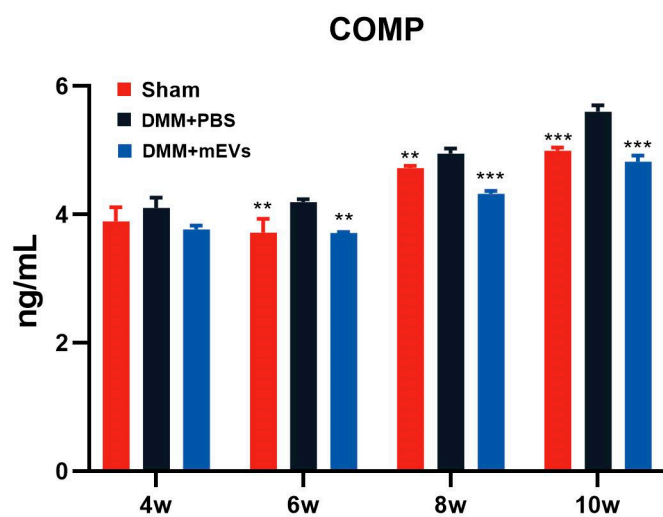

**Figure S2** The serum COMP levels were determined by ELISA. All data are shown as means  $\pm$  SD deviation ( $n = 3$ ). \*\* $p < 0.01$ , \*\*\* $p < 0.001$  vs. DMM+PBS group.

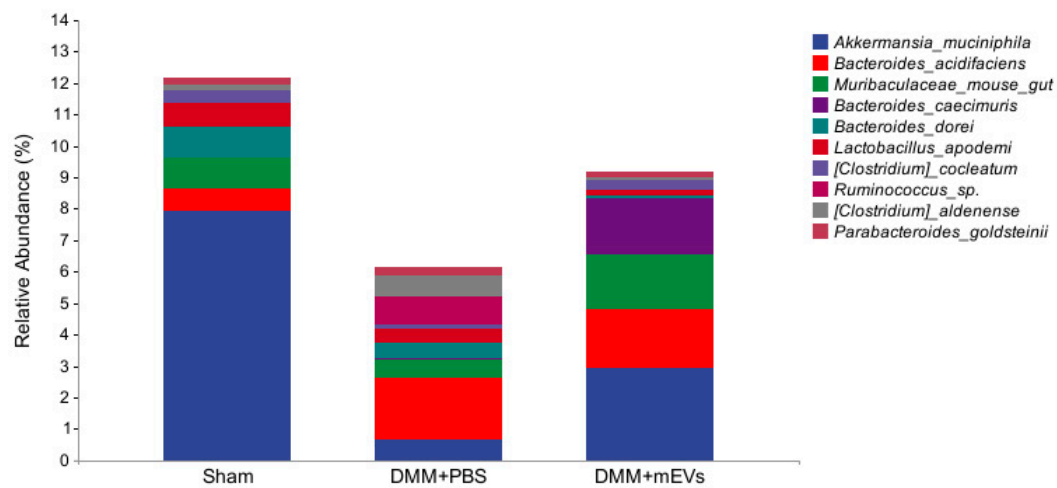

**Figure S3** The relative abundance of species in each experimental group.

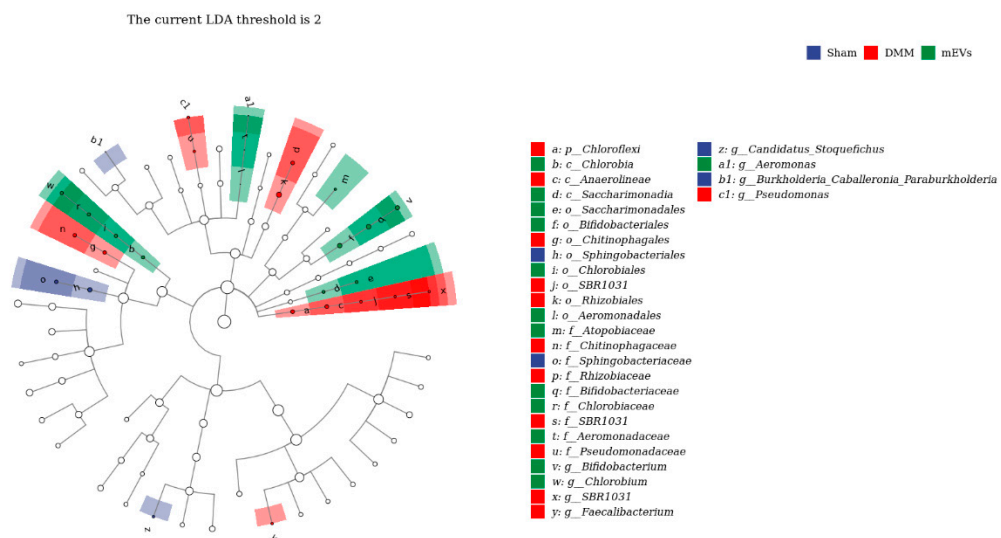

**Figure S4** Cladogram based on linear discriminant analysis effect size (LEfSe) analysis showing community composition of the gut microbiota in mice.
